# Supplementary material for: Associations of Partnership Quality and Father-to-Child Attachment During the Peripartum Period. A Prospective-Longitudinal Study in Expectant Fathers
Source: PubMed Central journal article supplement (PMC8093807; doi:10.3389/fpsyt.2021.572755), 2021-04-20
Supplement: Data_Sheet_1.pdf [file Data_Sheet_1.pdf]

## Supplemental material.

Supplemental Table S1. Sociodemographic description of mothers, fathers and infants ( $n=306$ )

|                                           | Total sample     |        | Mother sample    |        | Parents sample   |        | Test characteristics |         |
|-------------------------------------------|------------------|--------|------------------|--------|------------------|--------|----------------------|---------|
|                                           | <i>(n = 306)</i> |        | <i>(n = 197)</i> |        | <i>(n = 109)</i> |        | parameter            | p-value |
| Maternal age in years ( $n=306$ )         | mean=28.0        | SD=4.4 | mean=28.2        | SD=4.2 | mean=27.7        | SD=4.6 | t=1.02               | <0.05   |
| Paternal age in years ( $n=109$ )         | -                | -      | -                | -      | mean=31.1        | SD=5.8 | -                    | -       |
| Maternal education ( $n=306$ )            |                  |        |                  |        |                  |        |                      |         |
| ≤10y of education                         | n=98             | 32.0%  | n=71             | 36.0%  | n=27             | 24.7%  | chi2=4.09            | <0.05   |
| >10y of education                         | n=208            | 68.0%  | n=126            | 64.0%  | n=82             | 75.2%  |                      |         |
| Paternal education ( $n=306$ )            |                  |        |                  |        |                  |        |                      |         |
| ≤10y of education                         | n=125            | 40.8%  | n=92             | 46.7%  | n=33             | 30.3%  | chi2=7.84            | <0.01   |
| >10y of education                         | n=181            | 59.2%  | n=105            | 53.3%  | n=76             | 69.7%  |                      |         |
| Maternal status of employment ( $n=306$ ) |                  |        |                  |        |                  |        |                      |         |
| not employed                              | n=30             | 9.8%   | n=24             | 12.2%  | n=6              | 5.5%   | chi2=3.54            | n.s.    |
| employed                                  | n=276            | 90.2%  | n=173            | 87.8%  | n=103            | 94.5%  |                      |         |
| Paternal status of employment ( $n=306$ ) |                  |        |                  |        |                  |        |                      |         |
| not employed                              | n=15             | 4.9%   | n=9              | 4.6%   | n=6              | 5.5%   | chi2=0.13            | n.s.    |
| employed                                  | n=291            | 95.1%  | n=188            | 95.4%  | n=103            | 94.5%  |                      |         |
| Marital status( $n=306$ )                 |                  |        |                  |        |                  |        |                      |         |
| not married                               | n=193            | 63.1%  | n=122            | 61.9%  | n=71             | 65.1%  | chi2=0.31            | n.s.    |
| married                                   | n=113            | 36.9%  | n=75             | 38.1%  | n=38             | 34.9%  |                      |         |
| Parity( $n=306$ )                         |                  |        |                  |        |                  |        |                      |         |
| primiparous mother                        | n=178            | 58.2%  | n=104            | 52.8%  | n=74             | 67.9%  | chi2=6.57            | <0.01   |
| multiparous mother                        | n=128            | 41.8%  | n=93             | 47.2%  | n=35             | 32.1%  |                      |         |
| Number of siblings ( $n=279$ )            |                  |        |                  |        |                  |        |                      |         |
| 0                                         | n=151            | 54.1%  | n=84             | 48.3%  | n=67             | 36.2%  | chi2=6.36            | <0.05   |
| 1 or more                                 | n=128            | 45.9%  | n=90             | 51.7%  | n=38             | 63.8%  |                      |         |
| Prematurity ( $n=286$ )                   |                  |        |                  |        |                  |        |                      |         |
| >37 weeks gestational age                 | n=11             | 3.9%   | n=9              | 5.0%   | n=2              | 1.9%   | chi2=1.81            | n.s.    |
| ≤37 weeks gestational age                 | n=175            | 96.1%  | n=170            | 95.0%  | n=105            | 98.1%  |                      |         |
| Mode of delivery ( $n=286$ )              |                  |        |                  |        |                  |        |                      |         |
| spontaneous vaginal delivery              | n=225            | 78.7%  | n=137            | 76.5%  | n=88             | 82.2%  | chi2=1.30            | n.s.    |
| assisted delivery/ c-section              | n=61             | 21.3%  | n=42             | 23.5%  | n=19             | 17.8%  |                      |         |

|                                                          |           |         |           |         |           |         |                |                  |  |
|----------------------------------------------------------|-----------|---------|-----------|---------|-----------|---------|----------------|------------------|--|
| <b>Infant sex (n=286)</b>                                |           |         |           |         |           |         |                |                  |  |
| boys                                                     | n=147     | 51.4%   | n=86      | 48.0%   | n=61      | 57.0%   | chi2=2.15      | >0.1             |  |
| girls                                                    | n=139     | 48.6%   | n=93      | 52.0%   | n=46      | 43.0%   |                |                  |  |
| <b>Infant birth weight in kg (n=286)</b>                 | mean=3.44 | SD=0.5  | mean=3.36 | SD=0.5  | mean=3.58 | SD=0.4  | <b>t=-4.05</b> | <b>&lt;0.001</b> |  |
| <b>Breastfeeding (n=286)</b>                             |           |         |           |         |           |         |                |                  |  |
| exclusive at 4m pp                                       | n=219     | 76.6%   | n=132     | 73.7%   | n=87      | 81.3%   | chi2=2.14      | n.s.             |  |
| no or non-exclusive at 4m pp                             | n=67      | 23.4%   | n=47      | 26.3%   | n=20      | 18.7%   |                |                  |  |
| <b>Maternal social support at 22-24w GA (n=293)</b>      | mean=4.4  | SD=0.5  | mean=4.3  | SD=0.5  | mean=4.4  | SD=0.5  | t=-1.79        | n.s.             |  |
| <b>Paternal social support at 22-26w GA (n=103)</b>      | -         | -       | -         | -       | mean=4.3  | SD=0.6  |                |                  |  |
| <b>Maternal social support at 4m pp (n=281)</b>          | mean=4.3  | SD=0.6  | mean=4.3  | SD=0.7  | mean=4.4  | SD=0.5  | <b>t=-1.98</b> | <b>&lt;0.05</b>  |  |
| <b>Paternal social support at 4m pp (n=80)</b>           | -         | -       | -         | -       | mean=4.2  | SD=0.5  |                |                  |  |
| <b>Maternal partnership quality at 22-24w GA (n=285)</b> | mean=70.6 | SD=12.3 | mean=69.1 | SD=12.9 | mean=73.1 | SD=10.8 | <b>t=-2.74</b> | <b>&lt;0.01</b>  |  |
| <b>Paternal partnership quality at 22-26w GA (n=103)</b> | -         | -       | -         | -       | mean=67.2 | SD=10.9 |                |                  |  |
| <b>Maternal partnership quality at 4m pp (n=272)</b>     | mean=66.7 | SD=13.6 | mean=64.9 | SD=14.5 | mean=69.6 | SD=11.5 | <b>t=-2.75</b> | <b>&lt;0.01</b>  |  |
| <b>Paternal partnership quality at 4m pp (n=79)</b>      | -         | -       | -         | -       | mean=66.8 | SD=12.1 |                |                  |  |

---

m months, n number, n.s. not significant, pp postpartum SD standard deviation, t T-value, y years, bold prints indicate statistical significance at  $p < .05$

**Supplemental material**

**Supplemental Table S2.** Means and standard deviations for partnership quality at F-T1, F-T3 and across time

| Partnership quality (PFB) | Fathers at F-T1<br>(antenatal) |      |     |     | Fathers at F-T3<br>(postnatal) |       |      |     | difference<br>F-T3 minus F-t1 |    |              |
|---------------------------|--------------------------------|------|-----|-----|--------------------------------|-------|------|-----|-------------------------------|----|--------------|
|                           | Mean                           | SD   | min | max | Mean                           | SD    | min  | max | t                             | df | p            |
| Sum score                 | 68,12                          | 10,6 | 39  | 89  | 66,54                          | 12,24 | 29   | 90  | 2                             | 75 | 0,083        |
| Communication             | 22,78                          | 3,88 | 12  | 30  | 22,63                          | 4,56  | 9,00 | 30  | 0,38                          | 75 | 0,708        |
| Quarreling                | 5,17                           | 3,92 | 0   | 15  | 5,79                           | 4,59  | 0,00 | 18  | -1,64                         | 75 | 0,105        |
| Tenderness                | 20,51                          | 5,31 | 3   | 29  | 19,7                           | 6,00  | 4,00 | 30  | 1,88                          | 75 | 0,063        |
| Satisfaction              | 4,453                          | 0,66 | 2   | 5   | 4,22                           | 0,83  | 1,00 | 5   | 2,87                          | 73 | <b>0,005</b> |

PFB partnership quality

SD standard deviation, min minimum score, max maximum score, t T-Test, df degrees of freedom, p significance level (one-tailed) at p<.01

**Supplemental material**

**Supplemental Table S3.** Prospective associations between psychopathological load and partnership characteristics

|                            |                       | <b>Prospective associations with F-T3</b> |          |          |              |       | <b>Prospective associations with changes across peripartum (F-T3 - F-T1)</b> |          |          |              |      |
|----------------------------|-----------------------|-------------------------------------------|----------|----------|--------------|-------|------------------------------------------------------------------------------|----------|----------|--------------|------|
|                            |                       | <b>b</b>                                  | <b>t</b> | <b>p</b> | <b>95%CI</b> |       | <b>b</b>                                                                     | <b>t</b> | <b>p</b> | <b>95%CI</b> |      |
| PFB sum score <sup>1</sup> | one parent affected   | 0,12                                      | -0,44    | 0,663    | -0,68        | 0,43  | 0,17                                                                         | 0,67     | 0,506    | -0,34        | 0,69 |
|                            | both parents affected | 0,30                                      | -0,94    | 0,351    | -0,92        | 0,33  | 0,18                                                                         | 0,63     | 0,531    | -0,4         | 0,76 |
| Communication              | one parent affected   | 0,00                                      | 0,00     | 0,997    | -2,19        | 2,18  | 0,11                                                                         | 0,15     | 0,878    | -1,32        | 1,54 |
|                            | both parents affected | -1,07                                     | -0,87    | 0,389    | -3,52        | 1,39  | -0,13                                                                        | -0,17    | 0,868    | -1,74        | 1,48 |
| Quarreling <sup>1</sup>    | one parent affected   | -0,10                                     | -0,45    | 0,655    | -0,53        | 0,345 | -0,05                                                                        | -0,24    | 0,813    | -0,45        | 0,35 |
|                            | both parents affected | -0,07                                     | -0,28    | 0,778    | -0,56        | 0,42  | 0,61                                                                         | 0,27     | 0,786    | -0,39        | 0,51 |
| Tenderness <sup>1</sup>    | one parent affected   | -0,24                                     | -0,82    | 0,416    | -0,82        | 0,34  | 0,21                                                                         | 0,78     | 0,437    | -0,32        | 0,73 |
|                            | both parents affected | -0,40                                     | -1,20    | 0,221    | -1,06        | 0,25  | 0,42                                                                         | 0,14     | 0,159    | -0,17        | 1,10 |
| Satisfaction               | one parent affected   | -0,17                                     | -0,72    | 0,475    | -0,65        | 0,31  | -0,13                                                                        | -0,65    | 0,521    | -0,55        | 0,28 |
|                            | both parents affected | -0,16                                     | -0,59    | 0,559    | -0,69        | 0,38  | 0,01                                                                         | 0,05     | 0,963    | -0,45        | 0,47 |

<sup>1</sup> results based on robust regression.

PFB partnership quality questionnaire

pure A anxiety disorder only, pure D depressive disorder only, comorbid AD comorbid anxiety and depressive disorder, F-T1 week 22 to 24 of gestation, F-T3 at 4 months postpartum

b unstandardised regression coefficient, CI confidence interval, p significance level at 0.05, bold prints indicate statistical significance at p < .05

## Supplemental material

**Supplemental Table S4.** Means and standard deviations for father-to-infant attachment at F-T1 and F-T3

| Father-to-infant attachment         | Mean  | SD   | min | max |
|-------------------------------------|-------|------|-----|-----|
| antenatal attachment (PAAS at F-T1) |       |      |     |     |
| sum score                           | 62,34 | 5,78 | 48  | 75  |
| quality of attachment               | 35,38 | 2,79 | 28  | 40  |
| intensity of attachment             | 18,36 | 3,11 | 12  | 27  |
| postnatal attachment (PPAS at F-T3) |       |      |     |     |
| sum score                           | 75,70 | 8,72 | 52  | 92  |
| patience and tolerance              | 32,17 | 4,13 | 24  | 40  |
| pleasure in interaction             | 24,72 | 4,27 | 13  | 32  |
| affection and pride                 | 18,81 | 1,68 | 12  | 20  |

PAAS antenatal father-to-child-attachment, PPAQ postnatal father-to-child attachment, F-T1 week 22 to 24 of gestation, F-T3 at 4 months postpartum, SD standard deviation, min minimum score, max maximum score

## Supplemental material

**Supplemental Table S5.** Prospective associations between psychopathological load and father-to-child attachment

|                                    |                       | N  | mean  | SD   | b            | t            | p            | 95% CI       |              |
|------------------------------------|-----------------------|----|-------|------|--------------|--------------|--------------|--------------|--------------|
| <b>Antenatal attachment (PAAS)</b> |                       |    |       |      |              |              |              |              |              |
| PAAS sum score                     | no parent affected    | 19 | 63,74 | 5,72 |              |              |              |              |              |
|                                    | one parent affected   | 37 | 6,26  | 5,20 | -1,17        | -0,72        | 0,473        | -4,40        | 2,06         |
|                                    | both parents affected | 20 | 60,60 | 6,65 | -3,14        | -1,71        | 0,092        | -6,80        | 0,53         |
| PAAS quality of attachment         | no parent affected    | 19 | 36,16 | 2,75 |              |              |              |              |              |
|                                    | one parent affected   | 37 | 35,57 | 2,46 | -0,59        | -0,76        | 0,447        | -2,13        | 0,95         |
|                                    | both parents affected | 20 | 34,30 | 3,18 | <b>-1,86</b> | <b>-2,12</b> | <b>0,037</b> | <b>-3,60</b> | <b>-0,11</b> |
| PAAS intensity of attachment       | no parent affected    | 19 | 19,00 | 3,33 |              |              |              |              |              |
|                                    | one parent affected   | 37 | 18,27 | 2,77 | -0,73        | -0,83        | 0,410        | -2,49        | 1,03         |
|                                    | both parents affected | 20 | 17,90 | 3,52 |              |              |              |              |              |
| <b>Postnatal attachment (PPAS)</b> |                       |    |       |      |              |              |              |              |              |
| PPAS sum score                     | no parent affected    | 19 | 77,36 | 8,76 |              |              |              |              |              |
|                                    | one parent affected   | 37 | 76,61 | 7,83 | -0,76        | -0,31        | 0,757        | -5,60        | 4,09         |
|                                    | both parents affected | 20 | 72,46 | 9,79 | -4,91        | -1,78        | 0,079        | -1,04        | 0,59         |
| PPAS patience and tolerance        | no parent affected    | 19 | 31,95 | 4,27 |              |              |              |              |              |
|                                    | one parent affected   | 37 | 32,82 | 4,14 | 0,87         | 0,75         | 0,457        | -1,45        | 3,19         |
|                                    | both parents affected | 20 | 31,16 | 3,93 | -0,79        | -0,60        | 0,550        | -3,42        | 1,84         |
| PPAS pleasure in interaction       | no parent affected    | 19 | 26,38 | 4,26 |              |              |              |              |              |
|                                    | one parent affected   | 37 | 24,79 | 3,87 | -1,59        | -1,36        | 0,178        | -3,93        | 0,74         |
|                                    | both parents affected | 20 | 23,03 | 4,52 | <b>-3,35</b> | <b>-2,52</b> | <b>0,014</b> | <b>-6,00</b> | <b>-0,70</b> |
| PPAS affection an pride            | no parent affected    | 19 | 19,03 | 1,28 |              |              |              |              |              |
|                                    | one parent affected   | 37 | 19,00 | 1,38 | -0,03        | -0,07        | 0,947        | -0,97        | 0,91         |
|                                    | both parents affected | 20 | 18,27 | 2,35 | -0,77        | -1,43        | 0,156        | -1,83        | 0,30         |

PAAS antenatal father-to-child-attachment, PPAQ postnatal father-to-child attachment, pure A anxiety disorder only, pure D depressive disorder only, comorbid AD comorbid anxiety and depressive disorder

b unstandardised regression coefficient, CI confidence interval, M mean, SD Standard deviation, t T-Test, p significance level at 0.05, bold prints indicate statistical significance at  $p < .05$
